# Supplementary material
Source: PubMed Central journal article supplement (PMC3557591)
Supplement: NIHMS430735-supplement-1_si_001.pdf [file NIHMS430735-supplement-1_si_001.pdf]

# CHARMM-GUI Ligand Binder for Absolute Binding Free Energy Calculations and Its Application

*Sunhwan Jo<sup>1</sup>, Wei Jiang<sup>2</sup>, Hui Sun Lee<sup>1</sup>, Benoît Roux<sup>3,4\*</sup>, and Wonpil Im<sup>1\*</sup>*

<sup>1</sup>Department of Molecular Biosciences and Center for Bioinformatics, The University of  
Kansas, 2030 Becker Drive, Lawrence, KS 66047, USA

<sup>2</sup>Leadership Computing Facility, Argonne National Laboratory, 9700 South Cass  
Avenue, Building 240, Argonne, IL 60439, USA

<sup>3</sup>Department of Biochemistry and Molecular Biology, Gordon Center for Integrative  
Sciences, W323B 929 East 57th Street, Chicago, IL 60637, USA

<sup>4</sup>Biosciences Division, Argonne National Laboratory, 9700 South Cass Avenue, Building  
202, Argonne, IL 60439, USA

Key words: Free Energy Perturbation, Molecular Dynamics, Protein-ligand Interactions,  
T4 Lysozyme, FKBP12

---

\*Corresponding authors;  
B. Roux: roux@uchicago.edu  
W. Im: wonpil@ku.edu

**Table S1.** Anchoring atoms and reference restraint values used for FEP/MD simulations.

| Ligand                 | # <sup>§</sup> | $P_1^{\ddagger}$ | $P_2^{\ddagger}$ | $P_3^{\ddagger}$ | $L_1^{\ddagger}$ | $L_2^{\ddagger}$ | $L_3^{\ddagger}$ | $r_0$ | $\theta_0$ | $\phi_0$ | $\alpha_0$ | $\beta_0$ | $\gamma_0$ |
|------------------------|----------------|------------------|------------------|------------------|------------------|------------------|------------------|-------|------------|----------|------------|-----------|------------|
| benzene                | C1             | 98               | 103              | 71               | C3               | C6               | C1               | 6.9 Å | 60.9°      | 116.4°   | 90.8°      | -168.0°   | -77.6°     |
|                        | C2             | 98               | 95               | 150              | C3               | C6               | C2               | 6.8 Å | 82.3°      | 97.7°    | 97.2°      | 77.0°     | -99.6°     |
|                        | C3             | 98               | 102              | 112              | C3               | C2               | C1               | 6.9 Å | 68.6°      | -14.5°   | 90.0°      | -114.2°   | 84.1°      |
| indole                 | C1             | 98               | 94               | 3                | C8               | C1               | C5               | 6.8 Å | 107.6°     | -136.2°  | 65.0°      | -138.2°   | -79.7°     |
|                        | C2             | 98               | 94               | 1                | C8               | C5               | C4               | 6.8 Å | 106.6°     | -159.3°  | 94.6°      | 99.8°     | -116.9°    |
|                        | C3             | 98               | 94               | 152              | C8               | C7               | C3               | 6.9 Å | 105.2°     | 103.1°   | 64.9°      | 165.2°    | -107.4°    |
| <i>n</i> -butylbenzene | C1             | 98               | 95               | 153              | C1               | C6               | C2               | 6.6 Å | 88.6°      | 89.0°    | 102.0°     | 18.4°     | 100.2°     |
|                        | C2             | 98               | 93               | 2                | C1               | C2               | C4               | 6.6 Å | 104.4°     | -152.6°  | 109.6°     | 65.7°     | -98.4°     |
|                        | C3             | 98               | 150              | 129              | C1               | C8               | C9               | 6.7 Å | 95.2°      | -17.1°   | 102.3°     | -27.8°    | -124.8°    |
| SB3                    | C1             | 59               | 51               | 54               | O2               | C5               | O4               | 9.3 Å | 88.8°      | -0.05°   | 71.7°      | 120.5°    | 127.5°     |
|                        | C2             | 59               | 51               | 48               | O2               | O3               | C9               | 9.2 Å | 89.1°      | -60.0°   | 93.3°      | -177.8°   | -166.2°    |
|                        | C3             | 59               | 51               | 21               | O2               | C6               | C10              | 9.2 Å | 88.8°      | -86.1°   | 82.8°      | 137.1°    | 146.6°     |
| SBX                    | C1             | 59               | 80               | 75               | O2               | C8               | C12              | 9.4 Å | 75.4°      | 111.8°   | 104.4°     | -90.7°    | 154°       |
|                        | C2             | 59               | 57               | 55               | O2               | C4               | O3               | 9.4 Å | 78.0°      | -31.5°   | 56.5°      | -163.7°   | -109.8°    |
|                        | C3             | 59               | 99               | 101              | O2               | C23              | C10              | 9.5 Å | 79.8°      | 109.2°   | 139.4°     | -133.4°   | 158.1°     |
| FK5                    | C1             | 59               | 74               | 28               | O1               | C28              | C44              | 9.6 Å | 99.9°      | 13.9°    | 108.9°     | 116.5°    | -35.5°     |
|                        | C2             | 55               | 49               | 51               | C24              | C27              | O9               | 6.1 Å | 100.5°     | 145.0°   | 74.3°      | -160.5°   | 152.6°     |
|                        | C3             | 59               | 57               | 54               | O1               | C5               | O4               | 9.5 Å | 78.2°      | -40.04°  | 65.7°      | -162.2°   | 123.6°     |

<sup>§</sup>C1, C2, and C3 represent independent FEP/MD simulations for each ligand. <sup>††</sup> $P_1$ ,  $P_2$ , and  $P_3$  are defined as the protein backbone atoms of the corresponding residue numbers in the PDB file.  $L_1$ ,  $L_2$ , and  $L_3$  are defined as the non-hydrogen ligand atoms that are bonded to the corresponding atoms. See Figure S1 for the ligand structures and the corresponding atom names.

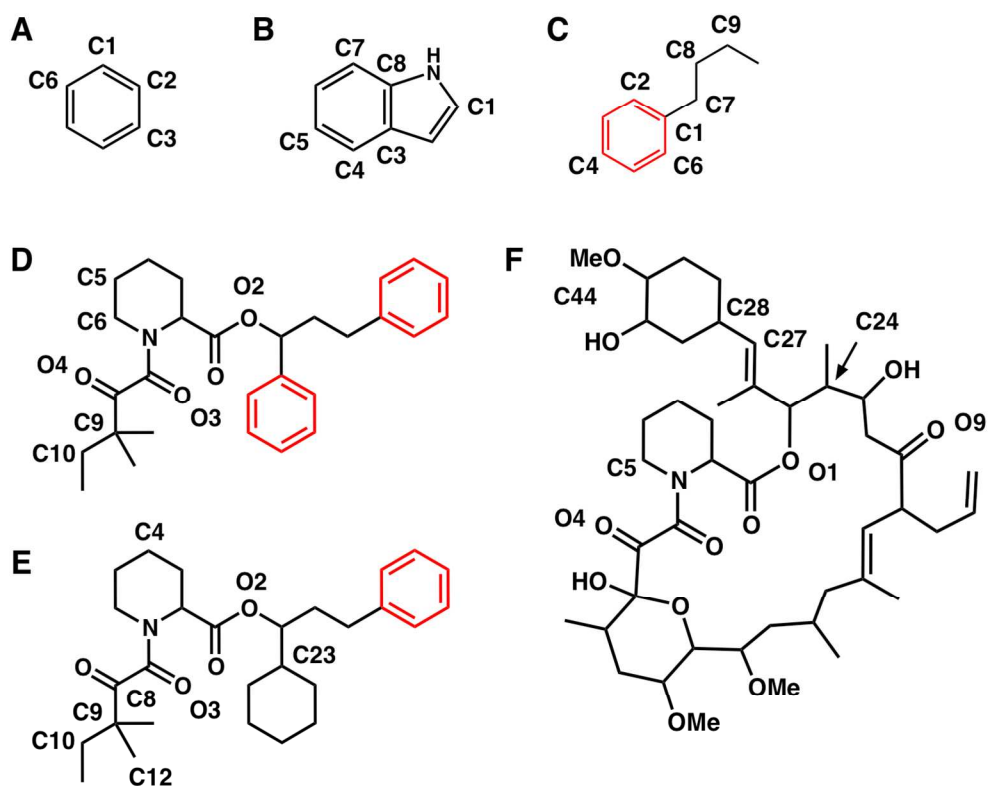

**Figure S1.** Structures of ligand molecules used in this work. Anchoring atoms used in the FEP/MD simulations are labeled. (A) Benzene, (B) Indole, (C) *n*-butylbenzene, (D) 1,3-diphenyl-1-propyl-1-(3,3-dimethyl-1,2-dioxypentyl)-2-piperidine carboxylate (SB3), (E) 1-cyclohexyl-3-diphenyl-1-propyl-1-(3,3-dimethyl-1,2-dioxypentyl)-2-piperidine carboxylate (SBX), and (F) K506 (FK5). Symmetric groups detected by *Ligand Binder* are colored in red.
